# Supplementary material for: Mixed-Effects Modelling of the Risk Factors Associated with Multiple Pregnancies in Thoroughbred Mares
Source: MDPI journal article supplement (doi:10.3390/ani12141841), 2022-07-20

Table S1: Descriptive and univariable analysis results of potential risk factors for multiple pregnancies (twinning) in a cohort of 1,754 thoroughbred mares (2,245 pregnancies) in the UK in the 2013 and 2014 breeding seasons. 'Mare' was included in the models as a random effect to account for repeat pregnancies in the same mare.

| Variable                            | Level    | n    | MP  | MP %  | 95% confidence interval (MP prevalence) | $\beta$ | Standard error ( $\beta$ ) | Odds ratio (OR) | 95% confidence interval (OR) | Likelihood ratio test p-value | % missing values |
|-------------------------------------|----------|------|-----|-------|-----------------------------------------|---------|----------------------------|-----------------|------------------------------|-------------------------------|------------------|
| Mare age (n=2239)                   | 2-5      | 574  | 103 | 17.94 | 14.81, 21.08                            | Ref.    |                            |                 |                              | 0.06                          | 0.27             |
|                                     | 6-10     | 976  | 135 | 13.83 | 11.67, 16.00                            | -0.34   | 0.16                       | 0.71            | 0.53, 0.97                   |                               |                  |
|                                     | 11+      | 689  | 119 | 17.27 | 14.45, 20.09                            | -0.06   | 0.16                       | 0.94            | 0.69, 1.30                   |                               |                  |
| Mare status (n=2245)                | Maiden   | 416  | 90  | 21.63 | 17.68, 25.59                            | Ref.    |                            |                 |                              | <0.001                        | 0                |
|                                     | Barren   | 308  | 71  | 23.05 | 18.35, 27.76                            | 0.08    | 0.19                       | 1.08            | 0.74, 1.58                   |                               |                  |
|                                     | Foaled   | 1407 | 177 | 12.58 | 10.85, 14.31                            | -0.69   | 0.16                       | 0.50            | 0.37, 0.68                   |                               |                  |
|                                     | Rested   | 114  | 22  | 19.30 | 12.05, 26.54                            | -0.14   | 0.28                       | 0.87            | 0.50, 1.51                   |                               |                  |
| EPL previous season (n=1541)        | No       | 1422 | 224 | 15.75 | 13.86, 17.65                            | Ref.    |                            |                 |                              | 0.03                          | 31.36            |
|                                     | Yes      | 119  | 28  | 23.53 | 15.94, 31.15                            | 0.59    | 0.27                       | 1.81            | 1.06, 3.10                   |                               |                  |
| Previous live foals (n=2206)        | 0        | 469  | 101 | 21.54 | 17.81, 25.26                            | Ref.    |                            |                 |                              | <0.001                        | 1.74             |
|                                     | 1-6      | 1187 | 151 | 11.82 | 10.83, 14.62                            | -0.68   | 0.16                       | 0.51            | 0.37, 0.69                   |                               |                  |
|                                     | 7+       | 550  | 101 | 18.36 | 15.13, 21.60                            | -0.21   | 0.17                       | 0.81            | 0.58, 1.14                   |                               |                  |
| Previous breeding seasons (n= 2207) | 0        | 415  | 89  | 21.45 | 17.50, 25.39                            | Ref.    |                            |                 |                              | <0.001                        | 1.7              |
|                                     | 1-7      | 1375 | 185 | 13.45 | 11.65, 15.26                            | -0.61   | 0.16                       | 0.54            | 0.40, 0.74                   |                               |                  |
|                                     | 8+       | 417  | 79  | 18.94 | 15.18, 22.71                            | -0.16   | 0.19                       | 0.85            | 0.58, 1.24                   |                               |                  |
| Number of cycles covered (n=2234)   | 1        | 1655 | 290 | 17.52 | 15.69, 19.35                            | Ref.    |                            |                 |                              | 0.002                         | 0.5              |
|                                     | $\geq 2$ | 455  | 70  | 12.09 | 9.43, 14.75                             | -0.47   | 0.16                       | 0.63            | 0.46, 0.85                   |                               |                  |
| Days from foaling to cover (n=1346) | 8-35     | 817  | 109 | 13.34 | 11.01, 15.67                            | Ref.    |                            |                 |                              | 0.03                          | 40.04            |
|                                     | 36-65    | 414  | 37  | 8.94  | 6.19, 11.69                             | -0.50   | 0.23                       | 0.61            | 0.39, 0.94                   |                               |                  |
|                                     | 66-123   | 113  | 18  | 15.93 | 9.18, 22.68                             | 0.28    | 0.32                       | 1.32            | 0.70, 2.48                   |                               |                  |

| Variable                          | Level       | n    | MP  | MP %  | 95% confidence interval (MP prevalence) | $\beta$ | Standard error ( $\beta$ ) | Odds ratio (OR) | 95% confidence interval (OR) | Likelihood ratio test p-value | % missing values |
|-----------------------------------|-------------|------|-----|-------|-----------------------------------------|---------|----------------------------|-----------------|------------------------------|-------------------------------|------------------|
| Month of cover (n=2243)           | Feb         | 304  | 67  | 22.04 | 17.38, 26.70                            | Ref.    |                            |                 |                              | 0.02                          | 0.09             |
|                                   | March       | 677  | 113 | 16.69 | 13.88, 19.50                            | -0.36   | 0.19                       | 0.70            | 0.48, 1.01                   |                               |                  |
|                                   | April       | 672  | 96  | 14.29 | 11.64, 16.93                            | -0.57   | 0.20                       | 0.56            | 0.38, 0.83                   |                               |                  |
|                                   | May         | 514  | 76  | 14.79 | 11.72, 17.83                            | -0.53   | 0.21                       | 0.59            | 0.39, 0.88                   |                               |                  |
|                                   | June-August | 76   | 8   | 10.53 | 3.63, 17.43                             | -0.97   | 0.43                       | 0.38            | 0.16, 0.88                   |                               |                  |
| Uterine fluid (n=2202)            | No          | 1443 | 229 | 15.87 | 13.98, 17.75                            | Ref.    |                            |                 |                              | 0.64                          | 1.92             |
|                                   | Yes         | 759  | 127 | 16.73 | 14.08, 19.39                            | 0.06    | 0.13                       | 1.06            | 0.82, 1.37                   |                               |                  |
| Uterine fluid (cm) (n=2202)       | 0           | 1443 | 229 | 15.87 | 13.98, 17.75                            | Ref.    |                            |                 |                              | 0.79                          | 1.92             |
|                                   | 1           | 532  | 85  | 15.98 | 12.86, 19.09                            | 0.00    | 0.15                       | 1.00            | 0.75, 1.34                   |                               |                  |
|                                   | 2           | 147  | 28  | 19.05 | 12.70, 25.40                            | 0.24    | 0.24                       | 1.27            | 0.79, 2.03                   |                               |                  |
|                                   | $\geq 3$    | 80   | 14  | 17.50 | 9.17, 25.83                             | 0.12    | 0.33                       | 1.12            | 0.59, 2.13                   |                               |                  |
| Uterine cysts (n=2240)            | No          | 1916 | 325 | 16.96 | 15.28, 18.64                            | Ref.    |                            |                 |                              | 0.004                         | 0.22             |
|                                   | Yes         | 324  | 35  | 10.8  | 7.42, 14.18                             | -0.56   | 0.2                        | 0.57            | 0.38, 0.85                   |                               |                  |
| Multiple ovulation (n=2215)       | No          | 1728 | 108 | 6.25  | 5.11, 7.39                              | Ref.    |                            |                 |                              | <0.001                        | 1.34             |
|                                   | Yes         | 487  | 248 | 50.92 | 46.48, 55.36                            | 2.74    | 0.13                       | 15.56           | 11.95, 20.24                 |                               |                  |
| Multiple ovulations (n=2215)      | None        | 1728 | 108 | 6.25  | 5.11, 7.39                              | Ref.    |                            |                 |                              | <0.001                        | 1.34             |
|                                   | Unilateral  | 206  | 101 | 49.03 | 42.20, 55.86                            | 2.67    | 0.17                       | 14.42           | 10.31, 20.17                 |                               |                  |
|                                   | Bilateral   | 281  | 147 | 52.31 | 46.47, 58.15                            | 2.8     | 0.15                       | 16.46           | 12.13, 22.30                 |                               |                  |
| Pre-oestrus Cloprostenol (n=2181) | No          | 1534 | 220 | 14.34 | 12.59, 16.10                            | Ref.    |                            |                 |                              | 0.001                         | 2.85             |
|                                   | Yes         | 647  | 131 | 20.25 | 17.15, 23.34                            | 0.45    | 0.14                       | 1.56            | 1.19, 2.04                   |                               |                  |
| Pre-oestrus altrenogest (n=2181)  | No          | 2044 | 328 | 16.05 | 14.46, 17.64                            | Ref.    |                            |                 |                              | 0.83                          | 2.85             |
|                                   | Yes         | 137  | 23  | 16.79 | 10.53, 23.05                            | 0.06    | 0.26                       | 1.06            | 0.64, 1.76                   |                               |                  |
| Pre-oestrus domperidone (n=2180)  | No          | 2121 | 343 | 16.10 | 14.54, 17.66                            | Ref.    |                            |                 |                              | 0.97                          | 2.9              |
|                                   | Yes         | 49   | 8   | 16.33 | 5.98, 26.6                              | 0.016   | 0.42                       | 1.02            | 0.44, 2.33                   |                               |                  |

| Variable                                      | Level      | n    | MP  | MP %  | 95% confidence interval (MP prevalence) | $\beta$ | Standard error ( $\beta$ ) | Odds ratio (OR) | 95% confidence interval (OR) | Likelihood ratio test p-value | % missing values |
|-----------------------------------------------|------------|------|-----|-------|-----------------------------------------|---------|----------------------------|-----------------|------------------------------|-------------------------------|------------------|
| Pre-oestrus sulpiride (n=2180)                | No         | 2122 | 344 | 16.21 | 14.64, 17.78                            | Ref.    |                            |                 |                              | 0.38                          | 2.9              |
|                                               | Yes        | 58   | 7   | 12.07 | 3.69, 20.45                             | -0.37   | 0.44                       | 0.69            | 0.29, 1.63                   |                               |                  |
| Pre-oestrus domperidone or sulpiride (n=2174) | No         | 2068 | 334 | 16.15 | 14.56, 17.74                            |         |                            |                 |                              | 0.57                          | 3.16             |
|                                               | Yes        | 106  | 15  | 14.15 | 7.52, 20.79                             | -0.17   | 0.31                       | 0.84            | 0.46, 1.54                   |                               |                  |
| Pre-oestrus GNRH (n = 2245)                   | No         | 2209 | 357 | 16.16 | 14.63, 17.70                            | Ref.    |                            |                 |                              | 0.19                          | 0                |
|                                               | Yes        | 36   | 3   | 8.33  | -0.70, 17.36                            | -0.77   | 0.64                       | 0.47            | 0.13, 1.62                   |                               |                  |
| Any pre-oestrus progesterone (n=2245)         | No         | 2029 | 319 | 15.72 | 14.14, 17.31                            |         |                            |                 |                              | 0.22                          | 0                |
|                                               | Yes        | 216  | 41  | 18.98 | 13.75, 24.21                            | 0.25    | 0.20                       | 1.28            | 0.87, 1.90                   |                               |                  |
| Any pre-oestrus hormones (n=2232)             | No         | 1370 | 196 | 14.31 | 12.45, 16.16                            | Ref.    |                            |                 |                              | 0.003                         | 0.58             |
|                                               | Yes        | 862  | 164 | 19.03 | 16.41, 21.65                            | 0.37    | 0.13                       | 1.44            | 1.13, 1.85                   |                               |                  |
| Ovulatory induction agent (n=2190)            | No         | 174  | 22  | 12.64 | 7.71, 17.58                             | Ref.    |                            |                 |                              | 0.18                          | 2.49             |
|                                               | Yes        | 2016 | 329 | 16.32 | 14.71, 17.93                            | 0.34    | 0.26                       | 1.40            | 0.84, 2.32                   |                               |                  |
| Ovulatory induction agent (n=2190)            | None       | 174  | 22  | 12.64 | 7.71, 17.58                             | Ref.    |                            |                 |                              | 0.08                          | 2.49             |
|                                               | HCG        | 591  | 83  | 14.04 | 11.24, 16.85                            | 0.14    | 0.28                       | 1.15            | 0.66, 2.00                   |                               |                  |
|                                               | Deslorelin | 1407 | 240 | 17.06 | 15.09, 19.02                            | 0.40    | 0.26                       | 1.49            | 0.89, 2.50                   |                               |                  |
|                                               | Other*     | 17   | 5   | 29.41 | 7.75, 51.07                             | 1.22    | 0.67                       | 3.39            | 0.92, 12.54                  |                               |                  |
| Intrauterine antibiotics at cover (n=2186)    | No         | 1092 | 170 | 15.57 | 13.42, 17.72                            | Ref.    |                            |                 |                              | 0.61                          | 2.63             |
|                                               | Yes        | 1094 | 179 | 16.36 | 14.17, 18.55                            | 0.07    | 0.13                       | 1.07            | 0.83, 1.37                   |                               |                  |
| Dexamethasone at cover (n=2186)               | No         | 2055 | 328 | 15.96 | 14.38, 17.54                            | Ref.    |                            |                 |                              | 0.99                          | 2.63             |
|                                               | Yes        | 131  | 21  | 16.03 | 9.75, 22.31                             | -0.00   | 0.27                       | 0.99            | 0.59, 1.69                   |                               |                  |
| Oxytocin at cover (n=2185)                    | No         | 1081 | 174 | 16.10 | 13.91, 18.29                            | Ref.    |                            |                 |                              | 0.80                          | 2.67             |
|                                               | Yes        | 1104 | 174 | 15.76 | 13.61, 17.91                            | -0.03   | 0.13                       | 0.97            | 0.75, 1.24                   |                               |                  |
| Intrauterine lavage at cover (n=2186)         | No         | 1668 | 262 | 15.71 | 13.96, 17.45                            | Ref.    |                            |                 |                              | 0.52                          | 2.63             |
|                                               | Yes        | 518  | 87  | 16.80 | 13.58, 20.01                            | 0.1     | 0.15                       | 1.10            | 0.82, 1.47                   |                               |                  |

\*Other ovulatory medications: Busorelin (n = 3), HCG + Busorelin (n = 10), HCG + Deslorelin (n = 1), ECG (n = 2), HCG + Deslorelin + Busorelin (n = 1)

Figure S1: The plots show the estimated residuals for: (a) studs; (b) mares; (c) stallions; and (d) veterinarians random-effects from the null models. For all variables, the 95% confidence interval does overlap the horizontal line at zero, indicating that the risk of multiple pregnancies did not differ significantly between studs, mares, stallions, or veterinarians. Only stud farms that contributed  $\geq 5$  mares and stallions that mated  $\geq 5$  mares were included in this analysis.

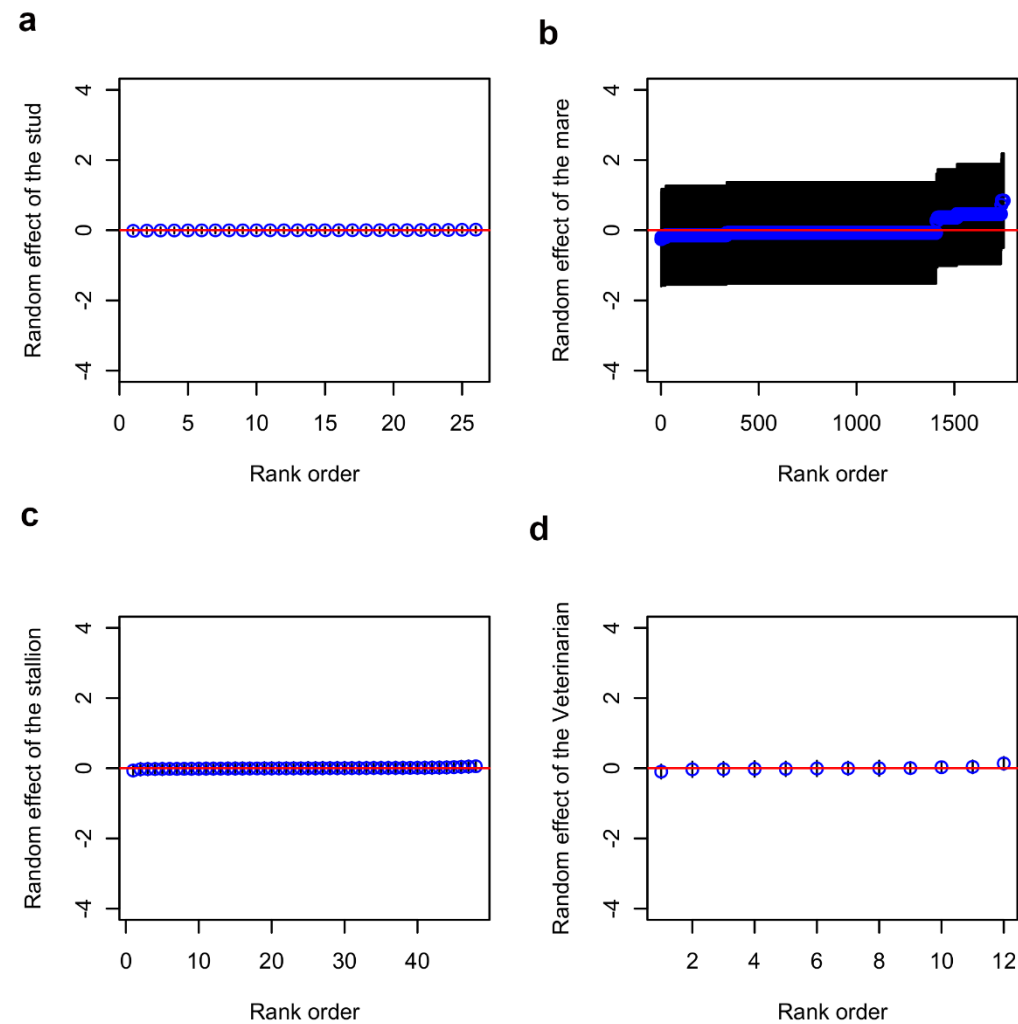

Supplement: s1 [file s1]
